# Supplementary material for: Integration of highly anisotropic multiferroic BaTiO3–Fe nanocomposite thin films on Si towards device applications
Source: Royal Society of Chemistry journal article supplement (doi:10.1039/d0na00405g), 2020-01-01
Supplement: d0na00405g1.pdf [file d0na00405g1.pdf]

## Supporting Information

### **Integration of highly anisotropic multiferroic BaTiO<sub>3</sub>-Fe nanocomposite thin films on Si towards device applications**

Matias Kalaswad,<sup>1</sup> Bruce Zhang,<sup>1</sup> Xuejing Wang,<sup>2</sup> Han Wang,<sup>2</sup> Xingyao Gao,<sup>2</sup> and Haiyan Wang<sup>1,2,\*</sup>

<sup>1</sup>School of Electrical and Computer Engineering, Purdue University, West Lafayette, Indiana 47907, USA

<sup>2</sup>School of Materials Engineering, Purdue University, West Lafayette, Indiana 47907, USA

Keywords: oxide-metal nanocomposites, room temperature multiferroics, hyperbolic dispersion, silicon integration

\*Author to whom correspondence should be addressed: [hwang00@purdue.edu](mailto:hwang00@purdue.edu)

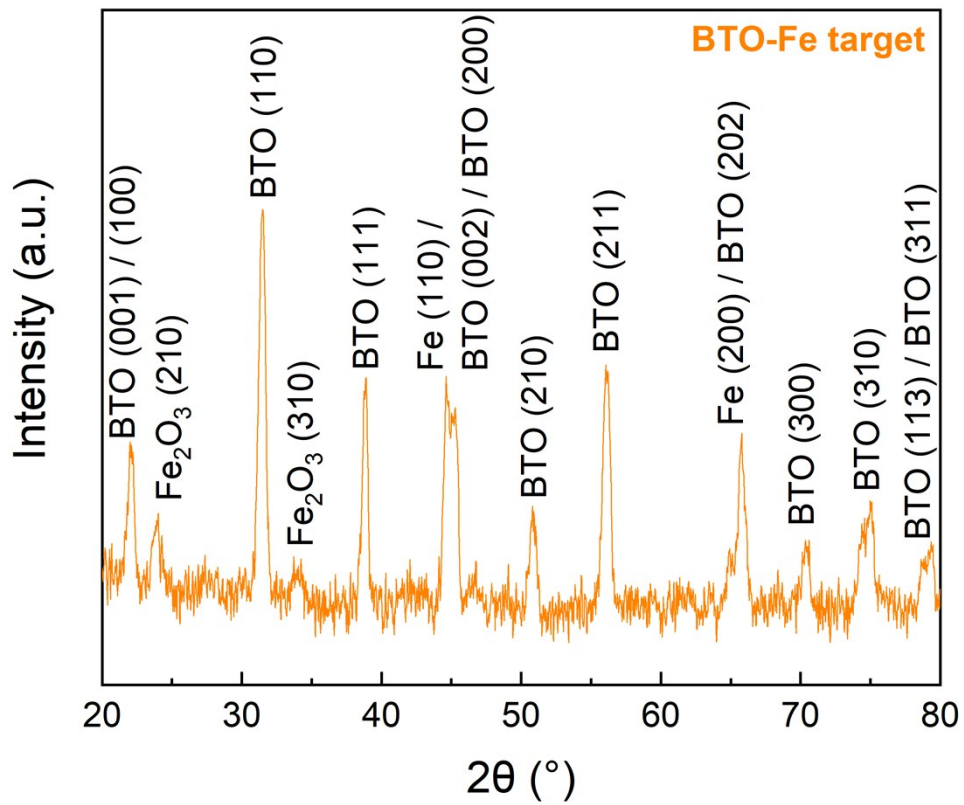

**Figure S1.** XRD  $\theta$ - $2\theta$  pattern of the BTO-Fe target showing polycrystalline BTO, Fe, and Fe<sub>2</sub>O<sub>3</sub> phases.

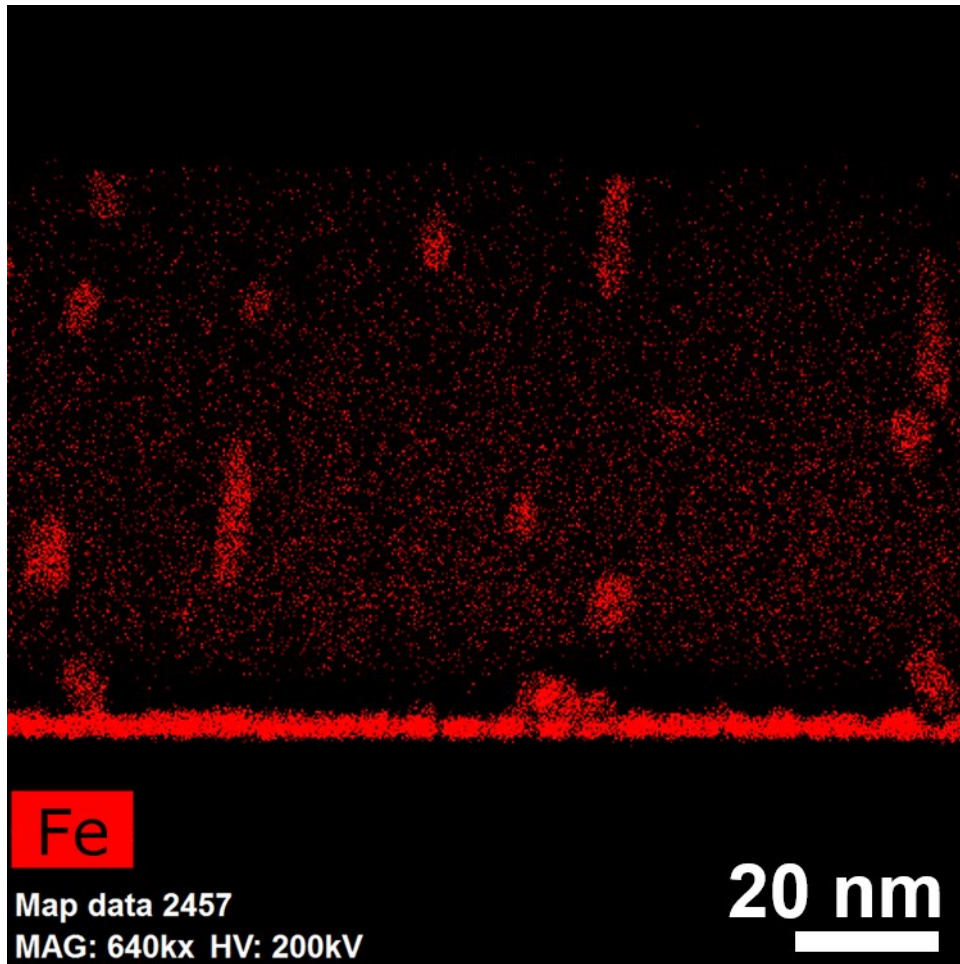

**Figure S2.** EDS elemental map of the BTO-Fe film grown directly on the Si (001) substrate, without buffer layer.

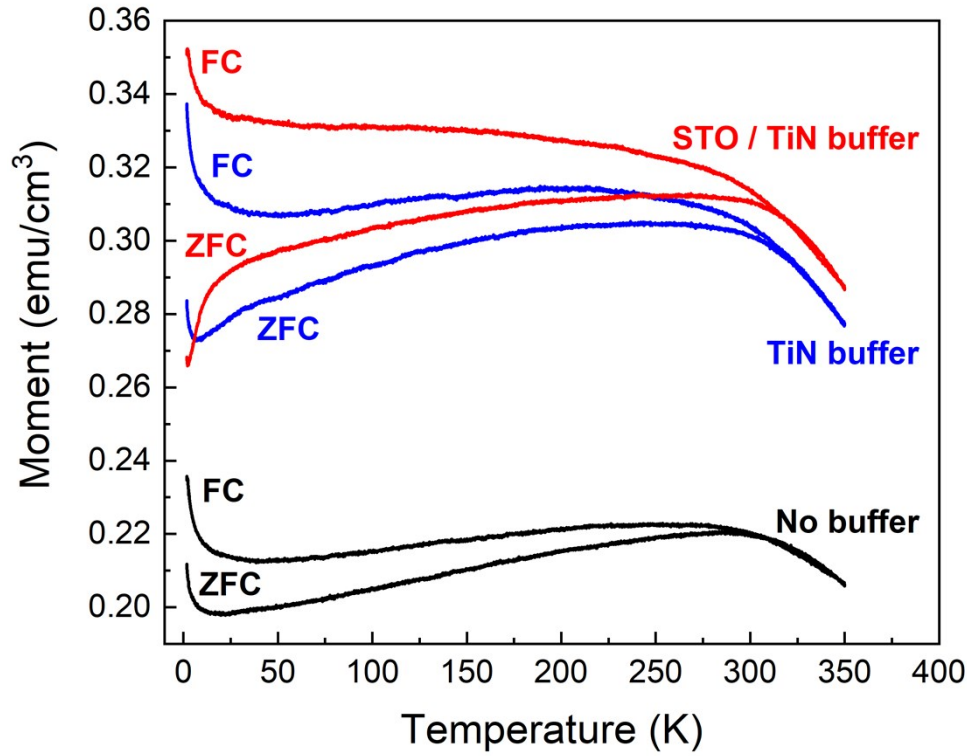

**Figure S3.** Field cooling (FC) and zero-field cooling (ZFC)  $M$ - $T$  curves of the BTO-Fe thin films grown on various buffer layer configurations.

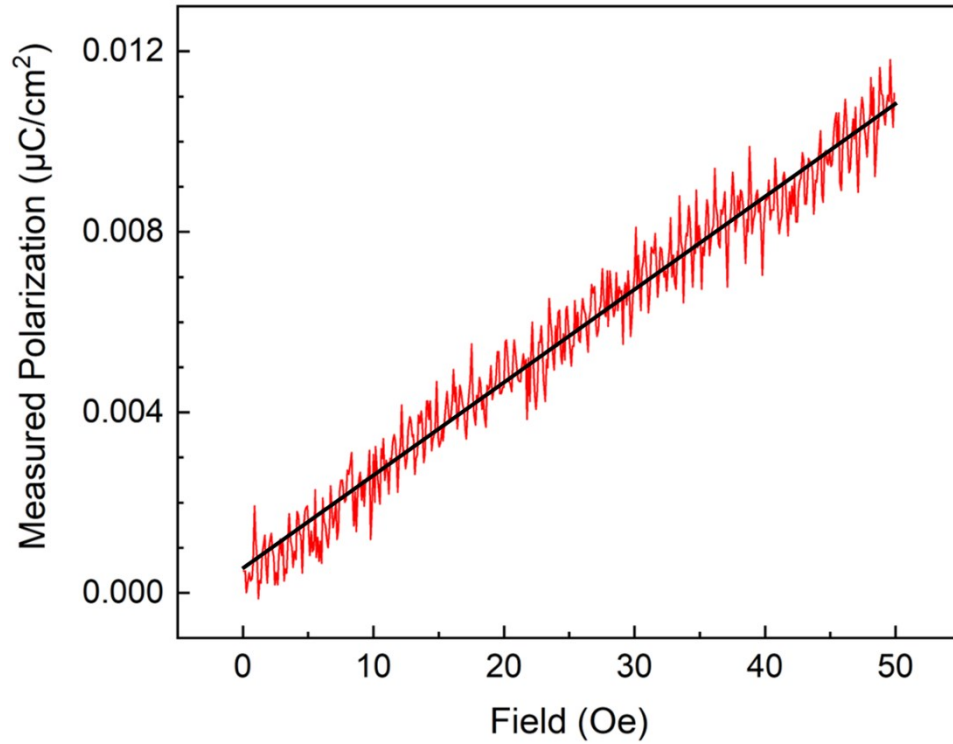

**Figure S4.** Room-temperature polarization as a function of magnetic field of the BTO-Fe nanocomposite thin film grown on a bilayer-buffered (STO / TiN) silicon substrate. The black line represents a linear fit of the data.
